# Supplementary material for: Mosaic DNA Imports with Interspersions of Recipient Sequence after Natural Transformation of Helicobacter pylori
Source: PLOS journal article supplement (doi:10.1371/journal.pone.0003797), 2008-11-22
Supplement: S1 (10.1371/journal.pone.0003797.s001) [file journal.pone.0003797.s001]

## Supporting information

Table S1: Bacterial strains

| Strain                            | Genotype                                                                                                                                                                                                                                                                                | Source     |
|-----------------------------------|-----------------------------------------------------------------------------------------------------------------------------------------------------------------------------------------------------------------------------------------------------------------------------------------|------------|
| <b><i>Escherichia coli</i></b>    |                                                                                                                                                                                                                                                                                         |            |
| DH5α                              | F <sup>-</sup> , φ80d/ <i>lacZ</i> ΔM15, Δ( <i>lacZ</i> Y <sup>+</sup> A- <i>argF</i> )U169, <i>deoR</i> , <i>recA1</i> , <i>endA1</i> , <i>hsdR17</i> (rk <sup>-</sup> , mk <sup>+</sup> ), <i>phoA</i> , <i>supE44</i> , λ <sup>-</sup> , <i>thi-1</i> , <i>gyrA96</i> , <i>relA1</i> | (S1)       |
| MC1065                            | <i>E. coli</i> K-12 <i>leuB6</i> Δ( <i>lacJ</i> POZY)X74 <i>trpC9830</i> <i>strA</i>                                                                                                                                                                                                    | (S2)       |
| <b><i>Helicobacter pylori</i></b> |                                                                                                                                                                                                                                                                                         |            |
| 26695                             | <i>H. pylori</i> wild type strain                                                                                                                                                                                                                                                       | (S3)       |
| J99                               | <i>H. pylori</i> wild type strain                                                                                                                                                                                                                                                       | (S4)       |
| N6                                | <i>H. pylori</i> wild type strain                                                                                                                                                                                                                                                       | (S5)       |
| 26695-R1                          | Derivative of 26695; T to C mutation at position 1757 in <i>rpoB</i> ; Rif <sup>r</sup>                                                                                                                                                                                                 | This study |
| J99-R3                            | Derivative of J99; A to T mutation at position 1618 in <i>rpoB</i> ; Rif <sup>r</sup>                                                                                                                                                                                                   | This study |
| N6-R1                             | Derivative of N6; C to T mutation at position 1589 in <i>rpoB</i> ; Rif <sup>r</sup>                                                                                                                                                                                                    | This study |
| 26695 <i>comB10</i>               | HP0042 (DNA transformation competence protein) from wt strain 26695 inactivated with <i>aphA3'</i> -III                                                                                                                                                                                 | This study |
| 26695 <i>magIII</i>               | HP0602 (3-Methyladenine glycosylase) from wt strain 26695 inactivated with <i>aphA3'</i> -III                                                                                                                                                                                           | This study |
| 26695 <i>mfd</i>                  | HP1541 (Transcription repair coupling factor) from wt strain 26695 inactivated with <i>cat</i>                                                                                                                                                                                          | This study |
| 26695 <i>mutS</i>                 | HP0621 (Predicted homologous and homeologous recombination protein) from wt strain 26695 inactivated with <i>aphA3'</i> -III                                                                                                                                                            | This study |
| 26695 <i>mutY</i>                 | HP0142 (A/G-specific adenine glycosylase) from wt strain 26695 inactivated with <i>aphA3'</i> -III                                                                                                                                                                                      | (S6)       |
| 26695 <i>mutY</i> comp            | 26695 <i>mutY</i> strain complemented with pADC-HpMutY plasmid                                                                                                                                                                                                                          | This study |
| 26695 <i>nth</i>                  | HP0585 (Endonuclease III) from wt strain 26695 inactivated with <i>cat</i>                                                                                                                                                                                                              | This study |
| 26695 <i>nucT</i>                 | HP0323 (Endonuclease) from wt strain inactivated with <i>aphA3'</i> -III                                                                                                                                                                                                                | This study |
| 26695 <i>recA</i>                 | HP0153 (Recombinase) from wt strain 26695 inactivated with <i>aphA3'</i> -III                                                                                                                                                                                                           | This study |
| 26695 <i>recB</i>                 | HP1553 ( <i>recB</i> homologue) from wt strain 26695 inactivated with <i>cat</i>                                                                                                                                                                                                        | This study |
| 26695 <i>recG</i>                 | HP1523 (Helicase) from wt strain 26695 inactivated with <i>cat</i>                                                                                                                                                                                                                      | This study |

|                        |                                                                                                            |            |
|------------------------|------------------------------------------------------------------------------------------------------------|------------|
| 26695 <i>recJ</i>      | HP0348 (single-stranded-DNA-specific exonuclease) from wt strain 26695 inactivated with <i>aphA3'</i> -III | This study |
| 26695 <i>recJ xseA</i> | HP0348 and JHP0243 (exonucleases) inactivated with <i>aphA3'</i> -III and <i>cat</i> , respectively        | This study |
| 26695 <i>recN</i>      | HP1393 (Predicted homologous recombination protein) from wt strain 26695 inactivated with <i>cat</i>       | This study |
| 26695 <i>recR</i>      | HP0925 (Predicted recombinational DNA repair protein) from wt strain 26695 inactivated with <i>cat</i>     | This study |
| 26695 <i>ruvA</i>      | HP0883 (Junction targeting protein) from wt strain 26695 inactivated with <i>aphA3'</i> -III               | This study |
| 26695 <i>ruvB</i>      | HP1059 (Helicase) from wt strain 26695 inactivated with <i>aphA3'</i> -III                                 | This study |
| 26695 <i>ruvC</i>      | HP0877 (Resolvase) from wt strain 26695 inactivated with <i>aphA3'</i> -III                                | This study |
| 26695 <i>ung</i>       | HP1347 (Uracil-DNA glycosylase) from wt strain 26695 inactivated with <i>cat</i>                           | This study |
| 26695 <i>xseA</i>      | JHP0243 (exonuclease VII, large subunit) from wt strain J99 inactivated with <i>cat</i>                    | This study |
| 26695 <i>xth</i>       | HP1526 (Exonuclease III) from wt strain 26695 inactivated with <i>aphA3'</i> -III                          | This study |
