# Supplementary material for: Mosaic DNA Imports with Interspersions of Recipient Sequence after Natural Transformation of Helicobacter pylori
Source: PLOS journal article supplement (doi:10.1371/journal.pone.0003797), 2008-11-22
Supplement: S3 (10.1371/journal.pone.0003797.s003) [file journal.pone.0003797.s003]

## Supporting information

Table S3: Plasmids used in this study

| Plasmids | Genotype                                                                                             | Source     |
|----------|------------------------------------------------------------------------------------------------------|------------|
| pBHpC8   | Source of the <i>cat</i> cassette                                                                    | (S7)       |
| pILL 600 | Source of the <i>aphA3'-III</i> cassette                                                             | (S8)       |
| pUC18    | Amp <sup>r</sup> , Col×101, MCS within <i>lacZ</i> : blue/white selection                            | (S9)       |
| pSUS1707 | Amp <sup>r</sup> , pUC18 derivative containing <i>mutS2</i>                                          | This study |
| pSUS1711 | Amp <sup>r</sup> , Km <sup>r</sup> , pSUS1707 derivative with a <i>mutS2::aphA3'-III</i> disruption  | This study |
| pSUS2500 | Amp <sup>r</sup> , pUC18 derivative containing <i>mutY</i>                                           | (S6)       |
| pSUS2501 | Amp <sup>r</sup> , pUC18 derivative containing <i>comB10</i>                                         | This study |
| pSUS2502 | Amp <sup>r</sup> , pUC18 derivative containing <i>recJ</i>                                           | This study |
| pSUS2503 | Amp <sup>r</sup> , pUC18 derivative containing <i>recA</i>                                           | This study |
| pSUS2508 | Amp <sup>r</sup> , Km <sup>r</sup> , pSUS2500 derivative with a <i>mutY::aphA3-III</i> disruption    | (S6)       |
| pSUS2509 | Amp <sup>r</sup> , Km <sup>r</sup> , pSUS2501 derivative with a <i>comB10::aphA3'-III</i> disruption | This study |
| pSUS2510 | Amp <sup>r</sup> , Km <sup>r</sup> , pSUS2502 derivative with a <i>recJ::aphA3'-III</i> disruption   | This study |
| pSUS2511 | Amp <sup>r</sup> , Km <sup>r</sup> , pSUS2503 derivative with a <i>recA::aphA3'-III</i> disruption   | This study |
| pSUS2518 | Amp <sup>r</sup> , pUC18 derivative containing <i>xth</i>                                            | This study |
| pSUS2520 | Amp <sup>r</sup> , Km <sup>r</sup> , pSUS2518 derivative with a <i>xth::aphA3'-III</i> disruption    | This study |
| pSUS2524 | Amp <sup>r</sup> , pUC18 derivative containing <i>xseA</i>                                           | This study |
| pSUS2525 | Amp <sup>r</sup> , Cm <sup>r</sup> , pSUS2524 derivative with a <i>xseA::cat</i> disruption          | This study |
| pSUS2526 | Amp <sup>r</sup> , pUC18 derivative containing <i>recR</i>                                           | This study |
| pSUS2527 | Amp <sup>r</sup> , pUC18 derivative containing <i>recN</i>                                           | This study |
| pSUS2528 | Amp <sup>r</sup> , pUC18 derivative containing <i>recG</i>                                           | This study |
| pSUS2529 | Amp <sup>r</sup> , pUC18 derivative containing <i>recB</i> homologue                                 | This study |
| pSUS2530 | Amp <sup>r</sup> , Cm <sup>r</sup> , pSUS2526 derivative with a <i>recR::cat</i> disruption          | This study |
| pSUS2532 | Amp <sup>r</sup> , Cm <sup>r</sup> , pSUS2527 derivative with a <i>recN::cat</i> disruption          | This study |
| pSUS2534 | Amp <sup>r</sup> , Cm <sup>r</sup> , pSUS2528 derivative with a <i>recG::cat</i> disruption          | This study |

|             |                                                                                                                        |            |
|-------------|------------------------------------------------------------------------------------------------------------------------|------------|
| pSUS2535    | Amp <sup>r</sup> , Cm <sup>r</sup> , pSUS2529 derivative with a <i>recB::cat</i> disruption                            | This study |
| pSUS2537    | Amp <sup>r</sup> , pUC18 derivative containing <i>nth</i>                                                              | This study |
| pSUS2538    | Amp <sup>r</sup> , pUC18 derivative containing <i>ung</i>                                                              | This study |
| pSUS2540    | Amp <sup>r</sup> , Cm <sup>r</sup> , pSUS2537 derivative with a <i>nth::cat</i> disruption                             | This study |
| pSUS2541    | Amp <sup>r</sup> , Cm <sup>r</sup> , pSUS2538 derivative with a <i>ung::cat</i> disruption                             | This study |
| pSUS2600    | Amp <sup>r</sup> , pUC18 derivative containing <i>magIII</i>                                                           | This study |
| pSUS2602    | Amp <sup>r</sup> , Km <sup>r</sup> , pSUS2600 derivative with a <i>magIII::aphA3'-III</i> disruption                   | This study |
| pSUS2604    | Amp <sup>r</sup> , pUC18 derivative containing <i>nucT</i>                                                             | This study |
| pSUS2606    | Amp <sup>r</sup> , Km <sup>r</sup> , pSUS2604 derivative with a <i>nucT::aphA3'-III</i> disruption                     | This study |
| pSUS2613    | Amp <sup>r</sup> , pUC18 derivative containing <i>mfd</i>                                                              | This study |
| pSUS2615    | Amp <sup>r</sup> , Cm <sup>r</sup> , pSUS2613 derivative with a <i>mfd::cat</i> disruption                             | This study |
| pSUS2616    | Amp <sup>r</sup> , pUC18 derivative containing <i>ruvA</i>                                                             | This study |
| pSUS2618    | Amp <sup>r</sup> , Km <sup>r</sup> , pSUS2616 derivative with a <i>ruvA::aphA3'-III</i> disruption                     | This study |
| pSUS2619    | Amp <sup>r</sup> , pUC18 derivative containing <i>ruvB</i>                                                             | This study |
| pSUS2621    | Amp <sup>r</sup> , Km <sup>r</sup> , pSUS2619 derivative with a <i>ruvB::aphA3'-III</i> disruption                     | This study |
| pSUS2622    | Amp <sup>r</sup> , pUC18 derivative containing <i>ruvC</i>                                                             | This study |
| pSUS2624    | Amp <sup>r</sup> , Km <sup>r</sup> , pSUS2622 derivative with a <i>ruvC::aphA3'-III</i> disruption                     | This study |
| pADC-HpMutY | Amp <sup>r</sup> , Cm <sup>r</sup> , <i>ureAB</i> fragment in pUC18 with <i>H. pylori mutY</i> and <i>cat</i> cassette | (S10)      |
